# Supplementary material for: Bupropion for the treatment of apathy in Huntington’s disease: A multicenter, randomised, double-blind, placebo-controlled, prospective crossover trial
Source: PubMed Central journal article supplement (PMC5360242; doi:10.1371/journal.pone.0173872), 2017-03-21

S1 Fig.: Study design

| visit | 1      | 2 | 3 | ph1 | 4  | 4a | 5  | ph2 | 6  | 7   |
|-------|--------|---|---|-----|----|----|----|-----|----|-----|
| week  | screen | 0 | 2 | 3   | 10 | 12 | 14 | 15  | 22 | FUP |

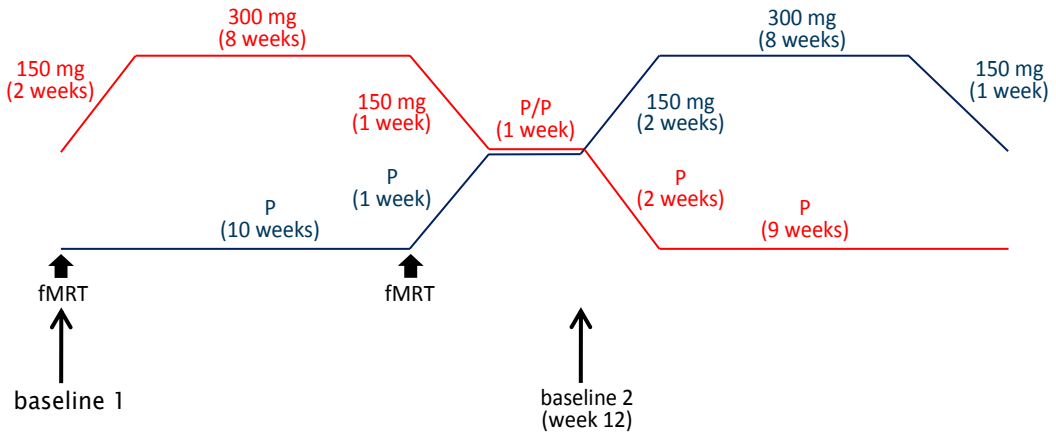

Supplement: pone.0173872.s004.pdf [file pone.0173872.s004.pdf]
