# Supplementary material for: Bupropion for the treatment of apathy in Huntington’s disease: A multicenter, randomised, double-blind, placebo-controlled, prospective crossover trial
Source: PubMed Central journal article supplement (PMC5360242; doi:10.1371/journal.pone.0173872), 2017-03-21

S2 Fig.: Experimental set up: Slot machine paradigm.

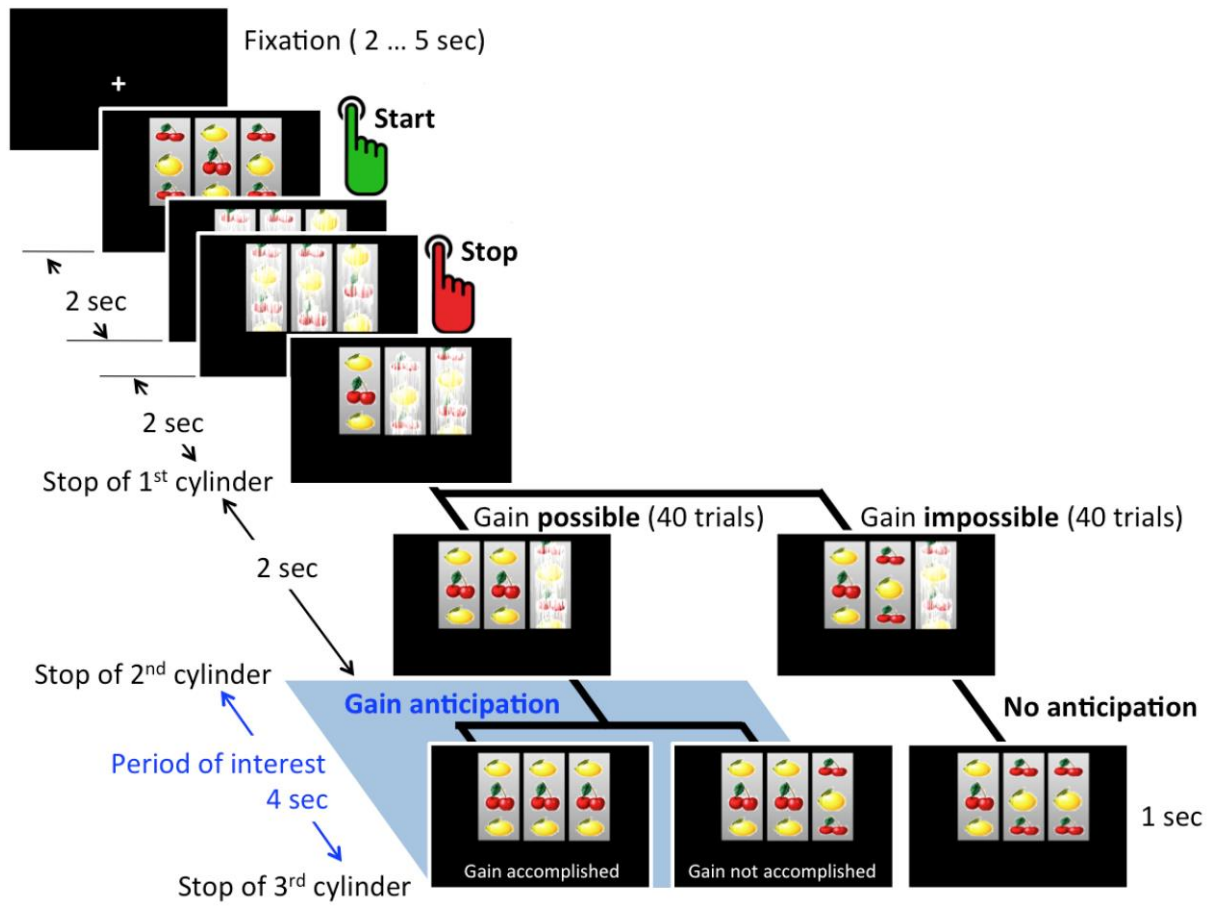

Supplement: pone.0173872.s005.pdf [file pone.0173872.s005.pdf]
