# Supplementary material for: Bupropion for the treatment of apathy in Huntington’s disease: A multicenter, randomised, double-blind, placebo-controlled, prospective crossover trial
Source: PubMed Central journal article supplement (PMC5360242; doi:10.1371/journal.pone.0173872), 2017-03-21

S4 Fig.: *A-priori* computed literature-based, probabilistic regions of interest (ROIs).

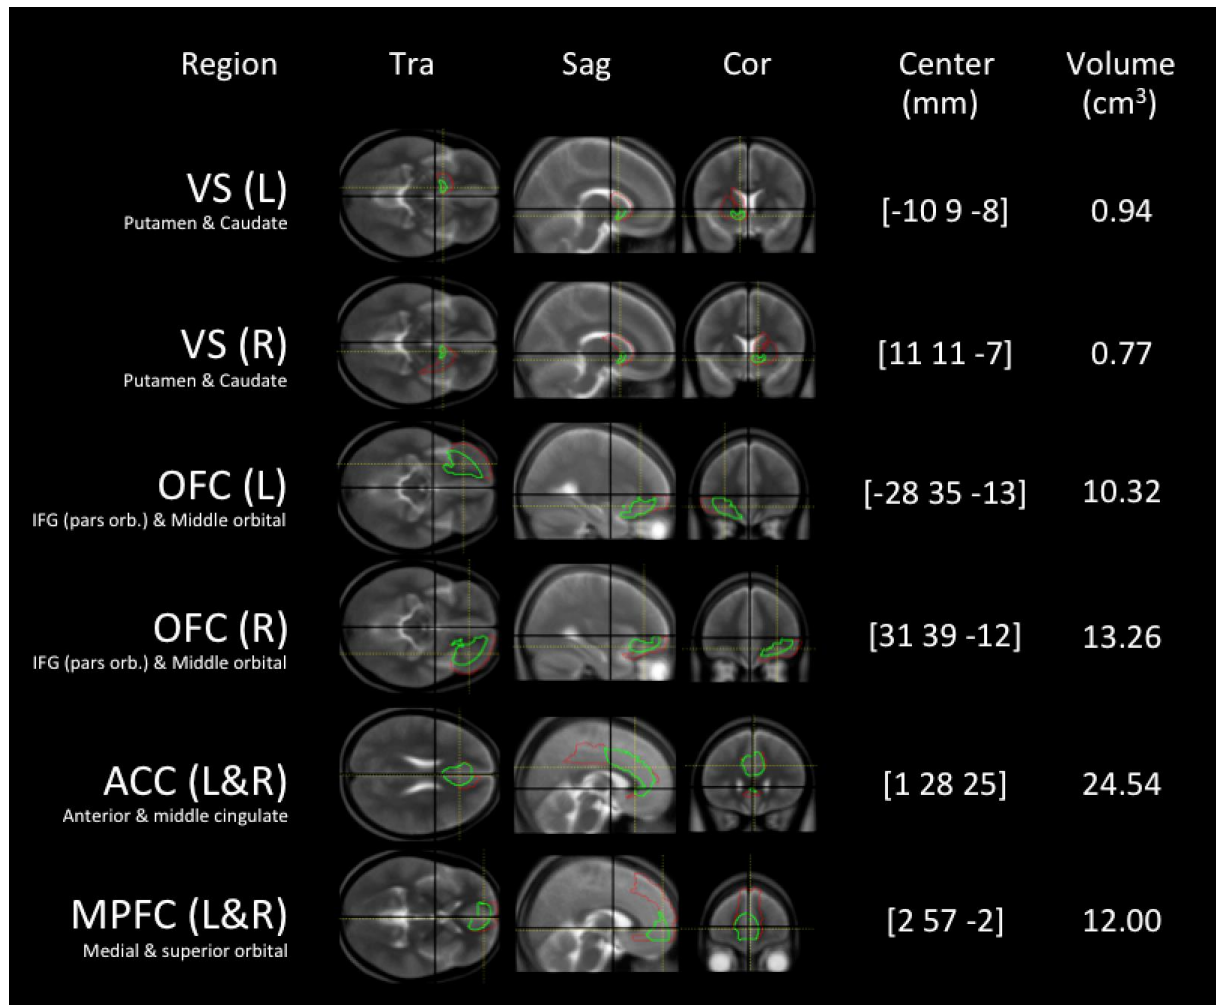

Supplement: pone.0173872.s007.pdf [file pone.0173872.s007.pdf]
